# Supplementary material
Source: Springer Nature journal article supplement (https://www.springermedizin.de/resource/supplementary/13017_2014_375_MOESM4_ESM.pdf/9636054)

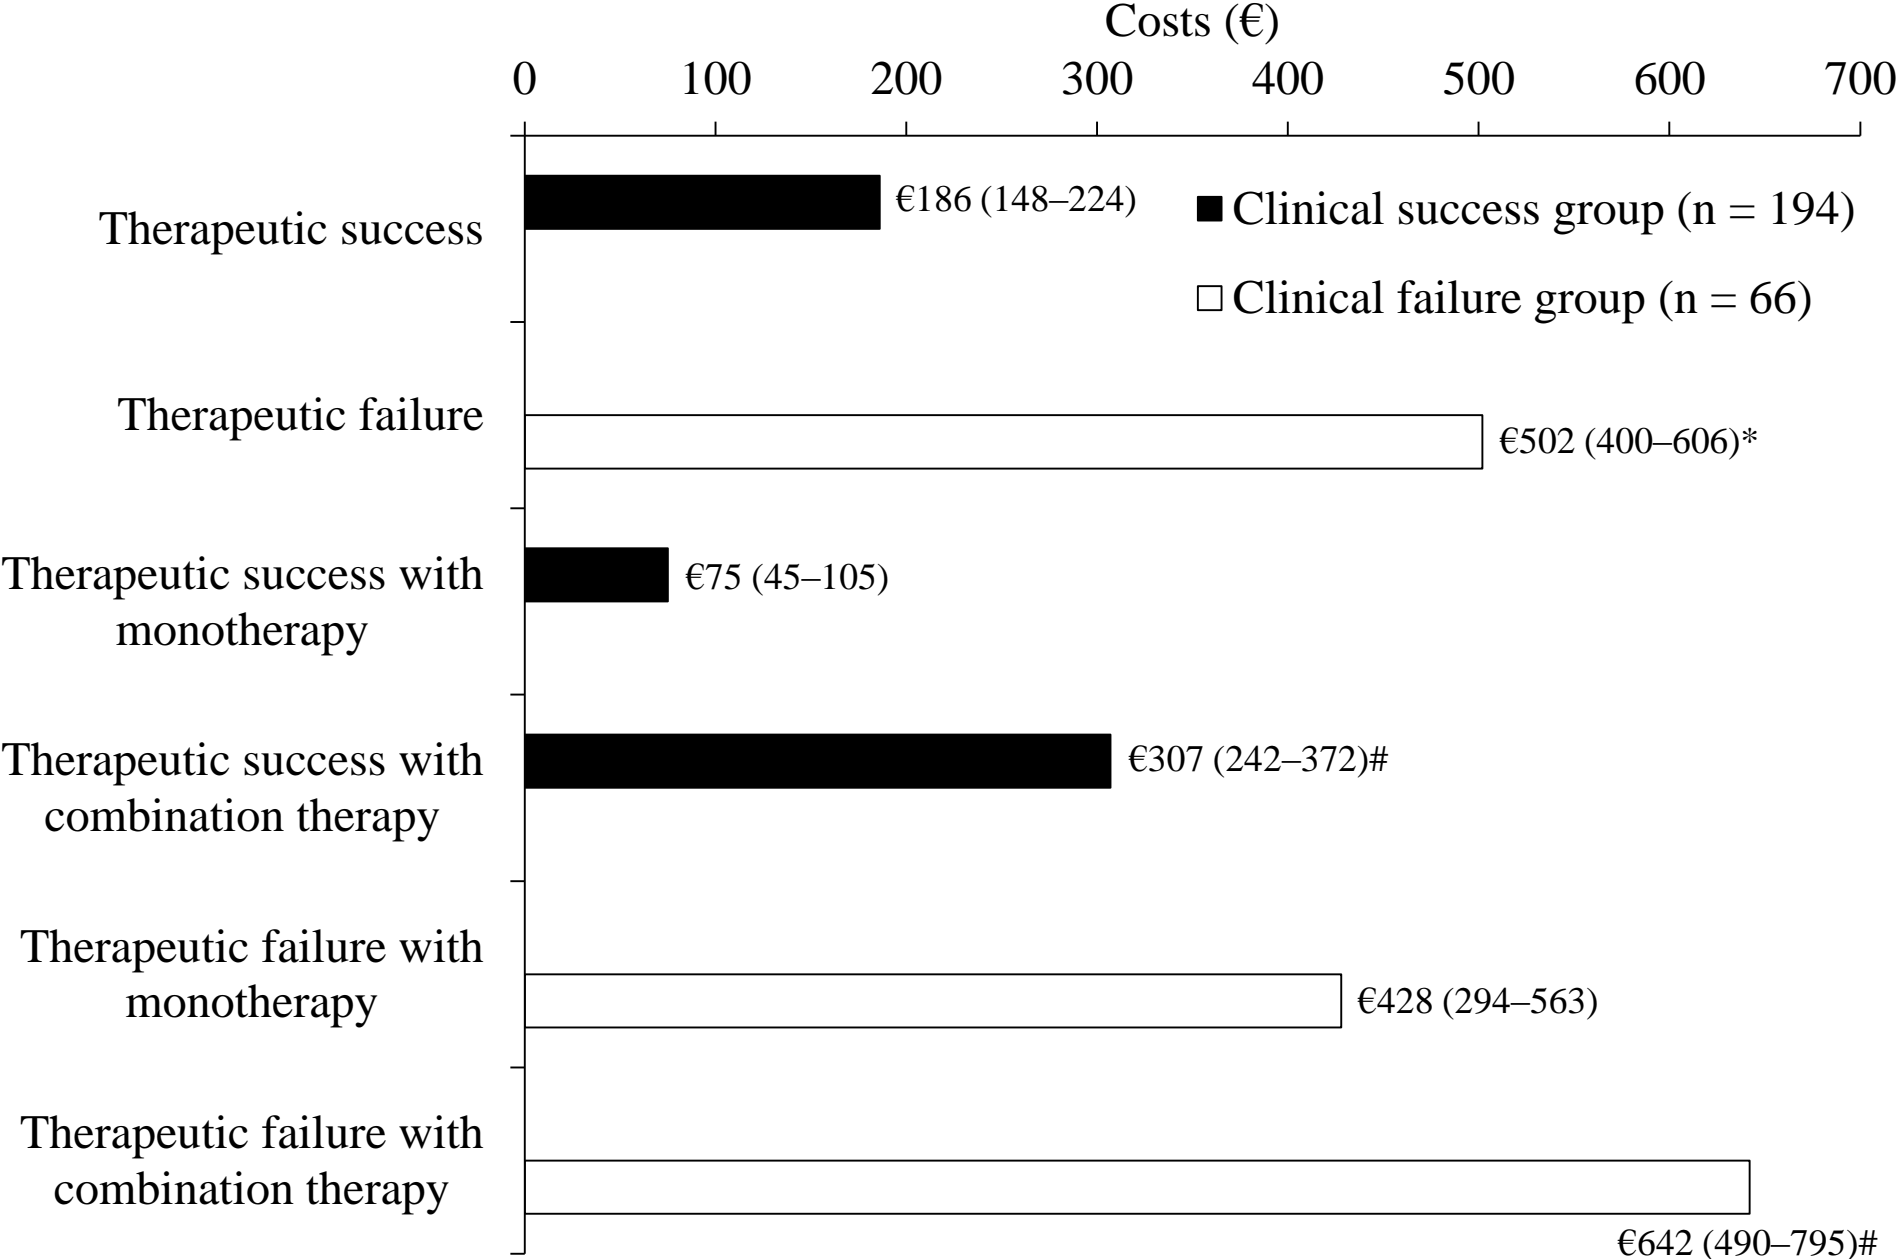

Supplement: MOESM4 [file 9636054]
